# Supplementary material
Source: publisher figshare collection journal article supplement (https://gsajournals.figshare.com/ndownloader/files/16827773)
Supplement: Supplementary file 1 [file 16827773]

IndivID	ParGroup
10	D
13	C
14	D
15	D
16	D
17	D
18	D
19	D
20	D
21	D
22	D
23	D
24	D
25	B
26	D
27	D
28	D
29	D
30	D
31	D
32	D
33	D
34	D
35	D
37	D
41	D
42	D
44	D
45	D
46	D
48	D
49	D
50	D
51	D
52	D
71	B
82	D
83	B
84	C
85	B
96	D
107	B
108	D
109	B
110	B
111	B
112	B
113	B
114	B
115	B
116	B
117	B
118	B
119	B
120	B
121	D
122	D
123	D
125	D
141	D
142	B
143	B
164	D
172	B
173	B
174	B
175	B
176	B
177	B
178	B
179	B
180	D
181	D
182	D
183	D
184	D
185	D
186	D
187	D
188	D
189	D
190	B
191	D
192	D
193	D
194	B
195	D
196	B
197	D
198	D
199	B
200	B
201	B
202	D
203	D
204	D
205	D
206	B
207	D
208	D
209	D
210	D
211	D
212	D
213	D
215	B
223	D
224	B
225	D
226	B
227	B
228	B
229	B
230	B
231	B
232	B
233	D
234	D
235	B
236	B
237	D
238	D
239	B
251	D
252	B
253	B
254	D
255	D
266	D
267	D
268	D
269	D
270	B
271	D
272	D
273	D
274	D
277	D
305	D
306	D
307	D
308	D
309	D
310	D
311	D
312	D
313	D
314	B
315	B
316	B
317	D
318	B
319	B
320	B
322	D
323	D
324	D
325	D
326	D
327	D
328	D
329	D
330	D
331	D
333	D
334	D
335	D
336	D
337	D
338	D
339	B
340	B
341	D
342	B
343	B
344	D
353	D
356	D
357	D
358	D
359	D
360	D
361	D
362	B
363	D
365	B
367	D
368	A
369	D
370	D
371	D
372	D
373	D
374	D
382	B
383	D
384	B
385	B
395	D
396	D
397	D
398	B
399	A
408	D
409	B
410	D
411	D
412	D
413	B
433	D
441	D
442	D
445	D
446	D
447	B
448	B
449	B
450	B
451	B
452	B
453	B
454	B
455	B
456	B
457	D
458	D
459	D
460	D
461	D
462	D
463	D
464	D
465	D
466	D
467	D
468	D
469	D
470	D
471	D
472	D
473	D
474	D
475	D
476	D
477	B
478	B
479	B
480	B
481	B
482	B
483	B
484	B
485	D
486	D
497	B
498	B
499	D
500	D
501	D
502	D
503	D
504	D
505	D
506	C
507	C
508	D
509	D
510	A
511	D
522	B
523	B
524	B
525	B
526	B
527	B
528	B
529	B
530	B
531	B
532	B
533	D
534	B
535	B
536	D
557	B
558	B
559	B
560	B
561	B
562	B
563	B
564	B
565	B
576	D
577	D
578	D
587	D
590	D
600	D
601	D
602	D
603	D
604	D
605	D
606	D
607	D
608	D
609	D
610	D
611	B
612	B
613	B
614	B
615	B
616	B
617	D
618	D
619	D
620	B
621	B
622	D
623	D
624	D
625	D
626	D
627	D
628	D
629	D
630	B
631	B
632	B
633	B
634	B
635	B
636	B
638	D
639	D
640	D
641	D
642	D
643	D
644	D
653	D
656	B
657	B
658	B
659	B
660	B
661	B
679	C
680	C
681	C
682	C
683	C
684	C
686	B
687	B
688	B
689	B
690	B
691	B
692	B
693	B
694	B
695	B
696	B
697	B
708	D
719	B
729	B
730	D
731	D
732	D
733	D
734	D
735	D
736	D
737	D
738	D
739	B
740	D
741	D
742	D
743	D
744	D
745	D
746	D
747	D
748	D
749	D
750	D
751	D
752	D
753	D
754	D
755	D
756	D
757	D
758	D
759	D
760	D
761	D
762	D
763	D
764	D
765	D
766	D
767	D
768	D
769	D
770	D
771	D
772	B
773	D
774	D
775	B
776	D
777	D
778	D
779	D
780	D
782	D
783	D
784	B
785	D
795	D
796	D
797	D
798	D
799	D
800	D
801	D
802	D
803	B
804	B
805	B
806	B
807	B
808	B
809	B
810	B
813	B
821	D
822	A
823	A
824	B
825	B
826	B
827	B
828	B
829	B
830	B
831	B
832	B
833	B
834	B
835	B
836	B
837	B
838	B
839	B
842	B
861	B
862	B
863	B
864	B
865	B
866	B
869	D
870	D
871	D
872	D
873	D
874	D
875	D
876	D
877	D
878	D
879	D
880	D
881	D
882	D
883	B
884	D
885	B
886	B
887	D
888	D
889	D
890	D
891	D
892	D
893	D
894	D
895	D
896	D
897	D
898	D
899	D
900	D
901	D
902	D
903	D
904	D
905	D
906	D
907	D
908	D
909	D
910	D
911	D
912	B
913	D
924	B
925	B
926	B
927	B
928	B
929	B
930	B
931	B
932	B
943	B
944	B
945	B
946	B
947	B
948	B
949	B
950	B
951	B
952	D
953	D
954	C
955	C
956	C
957	C
958	C
959	C
960	C
961	C
962	C
963	D
966	D
974	B
983	D
984	D
985	D
986	D
987	D
988	D
989	D
990	D
991	D
992	D
993	D
994	D
995	D
996	D
997	D
998	D
999	B
1000	B
1001	D
1002	B
1003	B
1004	B
1005	B
1006	D
1007	D
1008	D
1009	D
1010	B
1011	B
1012	B
1013	D
1014	D
1015	D
1016	D
1017	D
1018	B
1019	D
1020	B
1021	D
1022	D
1023	D
1024	B
1025	D
1026	D
1027	D
1028	D
1029	D
1030	D
1031	D
1034	B
1043	D
1045	B
1046	B
1047	B
1049	D
1060	D
1062	B
1063	B
1065	A
1066	A
1067	B
1068	B
1069	B
1070	A
1071	A
1072	B
1073	D
1074	D
1075	D
1076	D
1087	D
1090	B
1091	B
1092	B
1093	D
1094	B
1095	B
1096	B
1097	A
1098	C
1099	C
1100	C
1101	C
1102	C
1103	D
1104	C
1105	C
1106	C
1107	C
1114	D
1115	C
1116	D
1117	D
1118	D
1119	D
1120	D
1121	D
1122	D
1123	D
1124	D
1125	D
1126	D
1127	D
1128	D
1129	D
1130	D
1131	B
1132	B
1133	B
1134	B
1135	B
1136	D
1137	B
1138	D
1139	D
1140	D
1141	D
1142	D
1143	D
1144	B
1145	B
1146	B
1147	B
1148	B
1149	D
1150	D
1151	D
1152	D
1153	D
1154	D
1155	D
1156	D
1157	D
1158	B
1159	B
1160	A
1161	A
1162	A
1163	A
1164	A
1167	D
1168	D
1170	D
1171	D
1172	D
1173	D
1174	D
1175	D
1176	D
1177	D
1179	A
1190	D
1191	D
1192	D
1193	B
1194	B
1195	B
1196	B
1197	B
1198	B
1199	B
1200	B
1201	D
1202	D
1203	D
1204	D
1205	D
1206	D
1207	D
1216	D
1219	D
1220	D
1221	B
1222	D
1223	D
1224	A
1225	A
1226	B
1227	B
1228	B
1229	B
1230	A
1231	A
1232	B
1233	B
1234	B
1235	B
1236	D
1237	D
1258	D
1259	B
1260	D
1261	B
1262	B
1263	B
1264	B
1265	B
1266	B
1267	B
1268	B
1269	B
1270	B
1271	C
1272	C
1273	D
1274	C
1281	D
1282	D
1283	D
1284	D
1285	D
1286	D
1287	D
1288	D
1289	D
1290	D
1292	D
1293	D
1294	D
1295	D
1296	D
1297	D
1298	D
1299	D
1300	D
1301	D
1302	D
1303	D
1304	D
1305	D
1306	D
1307	D
1308	D
1309	D
1310	B
1311	B
1312	D
1313	D
1314	B
1315	D
1316	D
1317	D
1318	D
1319	D
1320	D
1321	D
1322	B
1323	D
1324	D
1325	D
1326	D
1327	D
1328	D
1329	B
1330	B
1331	D
1332	D
1342	B
1343	B
1344	B
1345	B
1346	B
1347	B
1348	B
1349	B
1350	B
1351	B
1353	D
1354	D
1355	B
1356	D
1369	D
1378	D
1379	B
1380	B
1381	B
1382	B
1383	B
1384	B
1385	B
1386	B
1387	B
1388	B
1389	B
1408	B
1411	B
1412	B
1413	B
1414	B
1415	B
1416	B
1417	B
1418	B
1419	D
1420	B
1421	B
1423	D
1424	C
1425	C
1426	D
1427	D
1428	D
1429	A
1430	A
1431	D
1432	D
1433	D
1434	D
1435	D
1436	D
1437	D
1438	D
1439	D
1440	D
1441	D
1449	B
1450	B
1451	D
1452	D
1453	D
1454	D
1455	D
1456	D
1457	D
1458	D
1459	D
1460	D
1461	B
1462	B
1463	B
1464	B
1465	D
1466	D
1467	B
1468	B
1469	D
1470	D
1471	D
1472	D
1473	D
1474	D
1475	D
1476	D
1477	D
1478	D
1479	D
1480	D
1481	D
1482	D
1483	D
1484	D
1485	B
1486	B
1487	D
1488	D
1492	B
1506	B
1507	B
1508	B
1509	D
1510	D
1511	D
1531	B
1532	B
1533	B
1534	B
1535	B
1536	B
1537	D
1538	B
1539	D
1540	D
1541	D
1552	D
1553	D
1554	B
1555	B
1556	B
1557	B
1558	B
1559	B
1560	B
1561	B
1562	B
1563	B
1564	D
1565	A
1566	A
1567	A
1568	A
1569	A
1570	A
1571	A
1572	A
1573	A
1574	A
1575	B
1585	D
1586	D
1587	D
1588	D
1589	D
1590	D
1591	D
1592	D
1593	D
1604	D
1605	D
1606	D
1607	D
1608	B
1609	B
1610	B
1611	B
1612	B
1613	B
1614	B
1615	B
1616	B
1617	B
1618	B
1619	B
1620	B
1621	D
1622	D
1623	D
1624	D
1625	D
1635	D
1636	D
1637	D
1638	D
1639	D
1640	D
1641	D
1642	D
1643	D
1644	D
1645	D
1646	D
1647	D
1649	D
1650	D
1662	B
1663	B
1664	B
1665	B
1666	B
1667	B
1668	B
1669	B
1672	A
1673	A
1674	A
1675	A
1676	A
1677	A
1678	A
1679	A
1680	A
1681	D
1684	B
1685	B
1694	D
1695	D
1696	D
1697	D
1698	D
1699	D
1700	D
1701	D
1702	D
1710	D
1711	D
1712	D
1713	B
1714	B
1715	B
1716	B
1717	B
1718	B
1719	B
1720	B
1721	D
1722	B
1723	D
1724	D
1725	D
1726	B
1727	D
1728	D
1729	D
1730	D
1741	D
1742	D
1743	D
1744	D
1745	D
1746	B
1747	B
1748	D
1749	B
1750	D
1751	D
1752	D
1753	D
1754	D
1755	D
1756	D
1757	D
1758	D
1759	D
1760	D
1761	D
1762	D
1763	D
1764	D
1765	D
1766	D
1767	D
1778	B
1779	B
1780	B
1781	B
1782	B
1783	B
1784	B
1785	B
1786	B
1787	B
1788	B
1800	D
1801	D
1802	B
1805	B
1806	B
1807	B
1815	D
1816	D
1817	D
1818	D
1819	D
1820	D
1821	D
1822	D
1823	D
1824	D
1825	D
1826	D
1829	D
1838	D
1839	D
1840	D
1841	D
1842	D
1843	D
1844	D
1845	D
1846	D
1847	D
1848	B
1849	D
1850	D
1851	B
1853	D
1862	D
1863	D
1864	D
1865	D
1866	D
1867	D
1868	D
1869	D
1870	D
1871	D
1872	D
1873	D
1875	D
1876	B
1877	B
1878	B
1879	B
1880	D
1881	D
1882	D
1883	D
1884	D
1885	D
1886	D
1887	D
1888	D
1889	D
1890	B
1899	B
1902	B
1903	B
1904	D
1916	D
1918	D
1920	B
1921	D
1923	D
1925	D
1927	D
1928	D
1939	D
1950	D
1951	D
1952	B
1953	B
1954	B
1955	B
1956	B
1957	B
1958	B
1959	B
1960	B
1961	D
1962	D
1963	D
1971	B
1974	D
1985	D
1986	B
1987	B
1988	B
1989	B
1990	B
1991	B
1992	B
1993	B
1994	B
